# Supplementary material for: Assessing Public Interest Based on Wikipedia’s Most Visited Medical Articles During the SARS-CoV-2 Outbreak: Search Trends Analysis
Source: PubMed Central journal article supplement (PMC8049630; doi:10.2196/26331), 2021-04-12

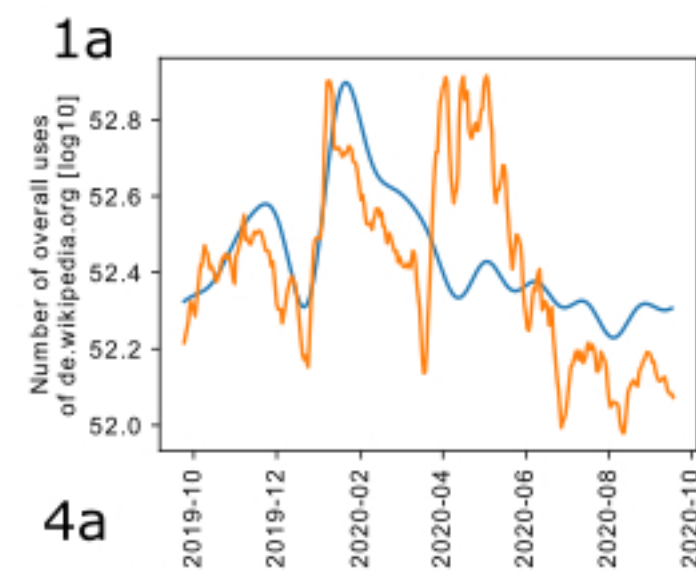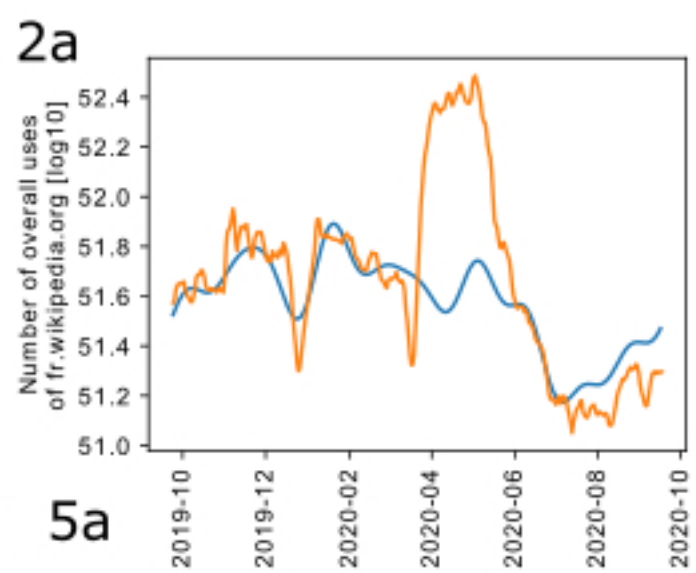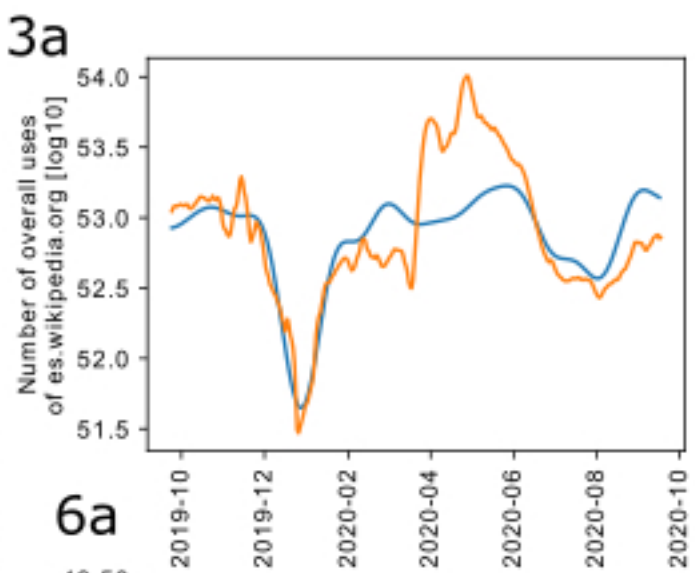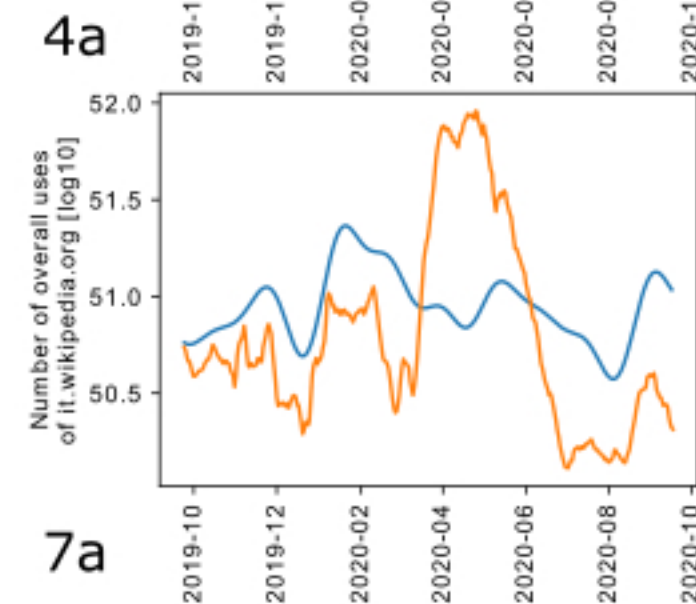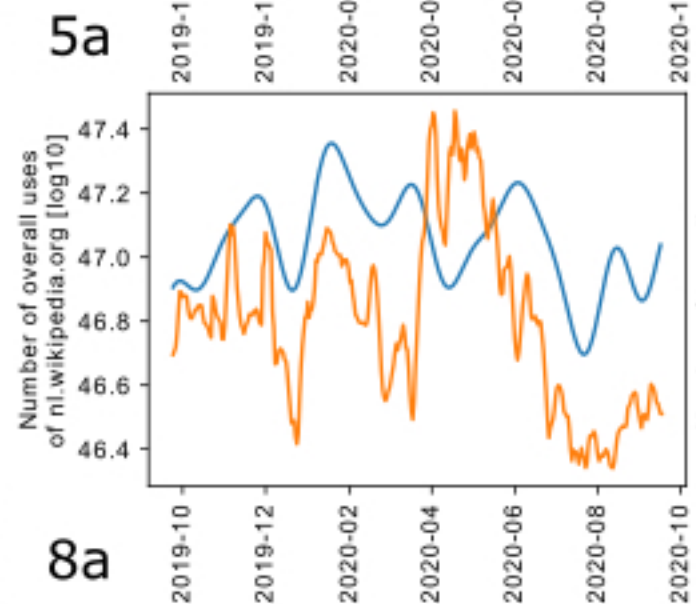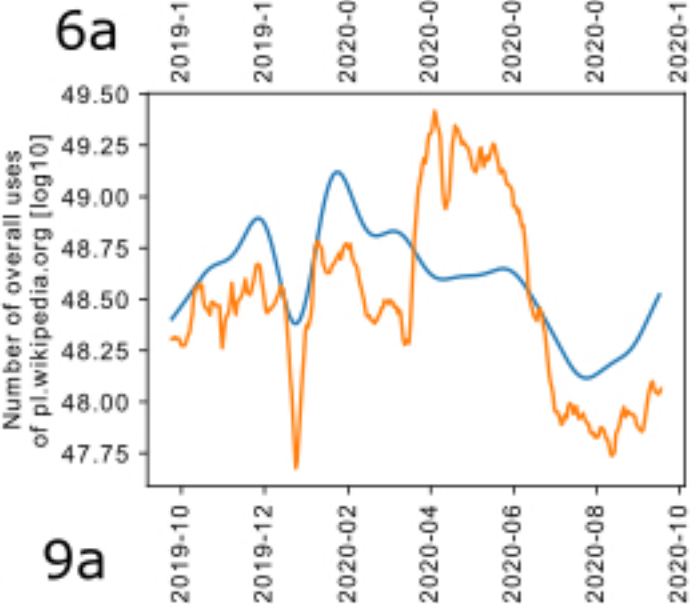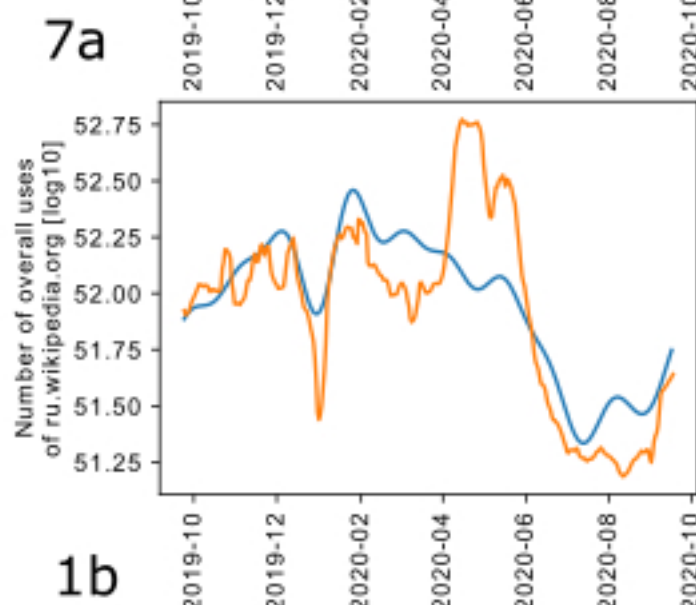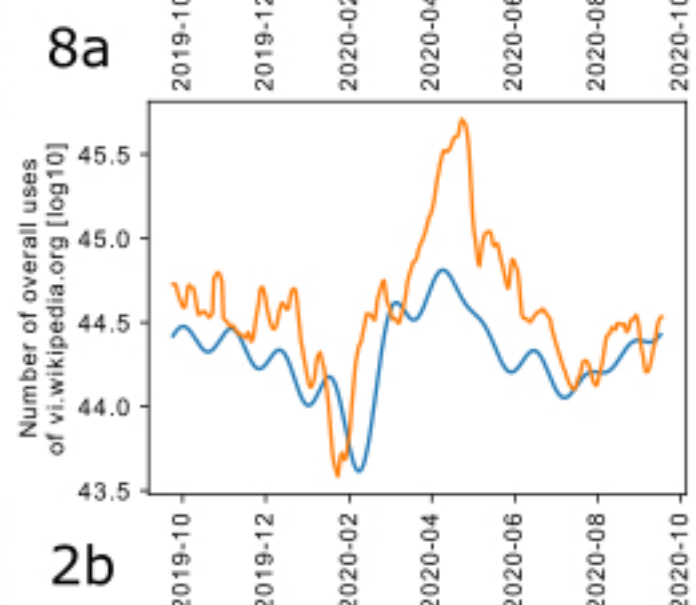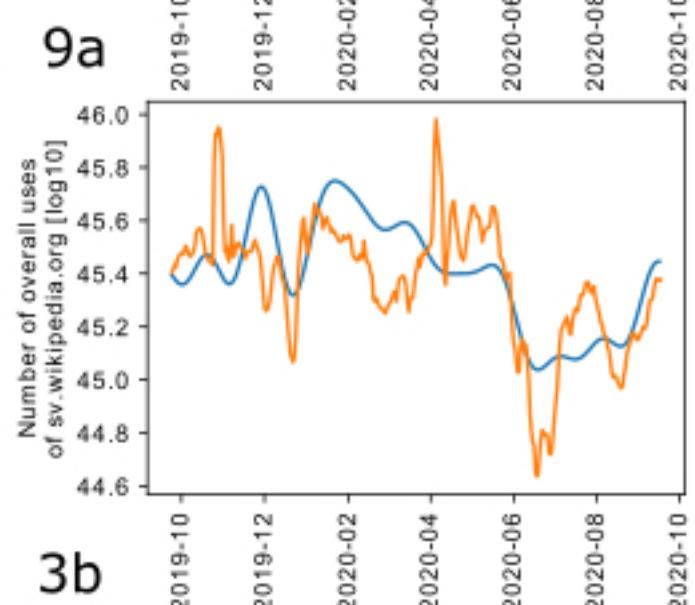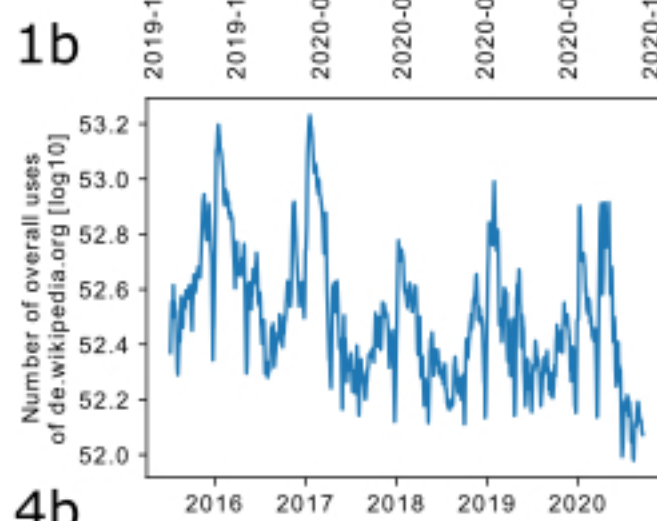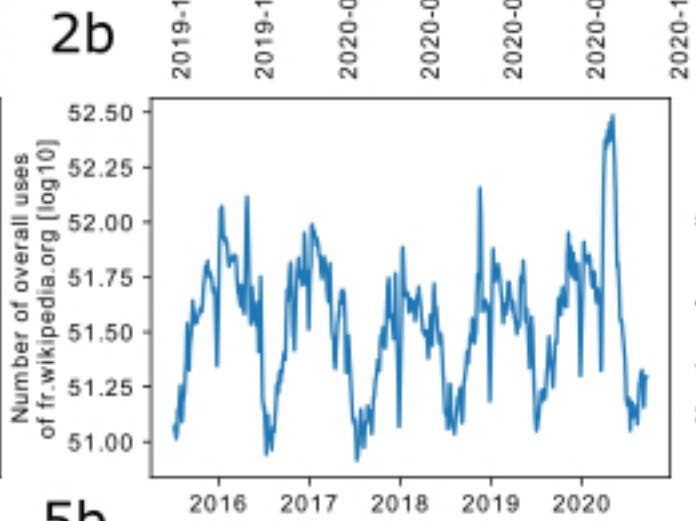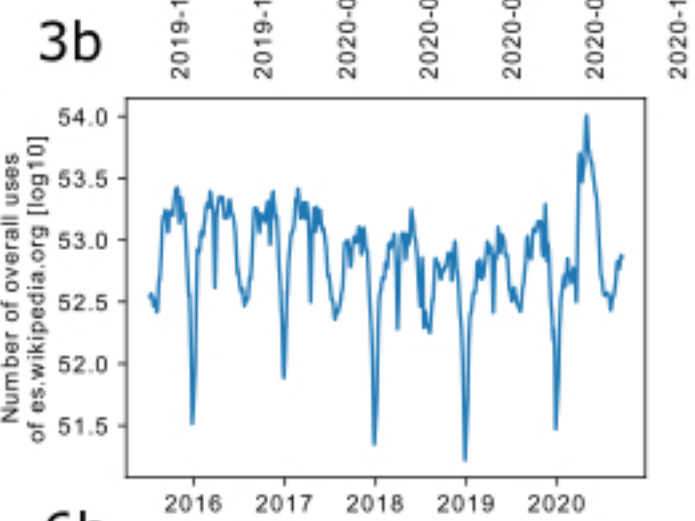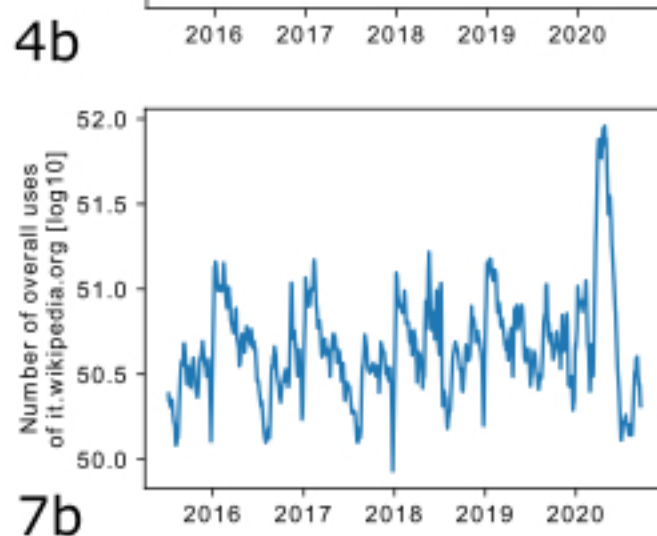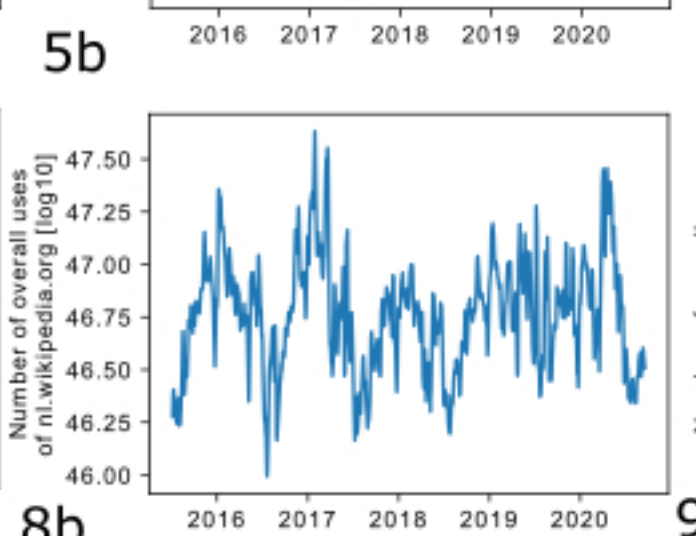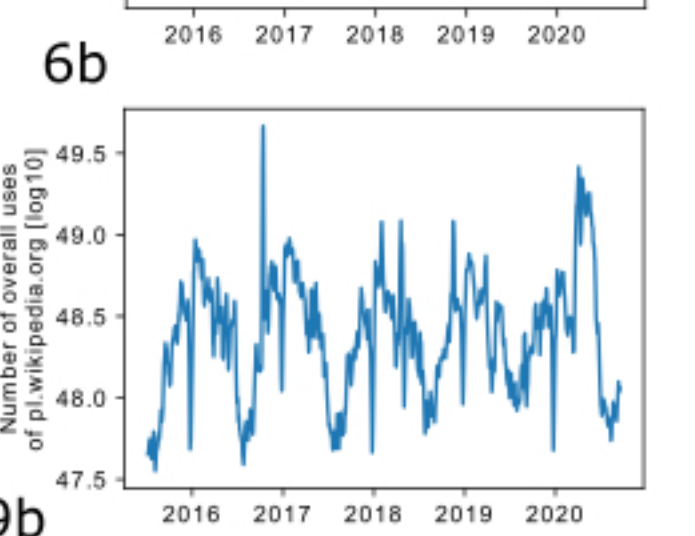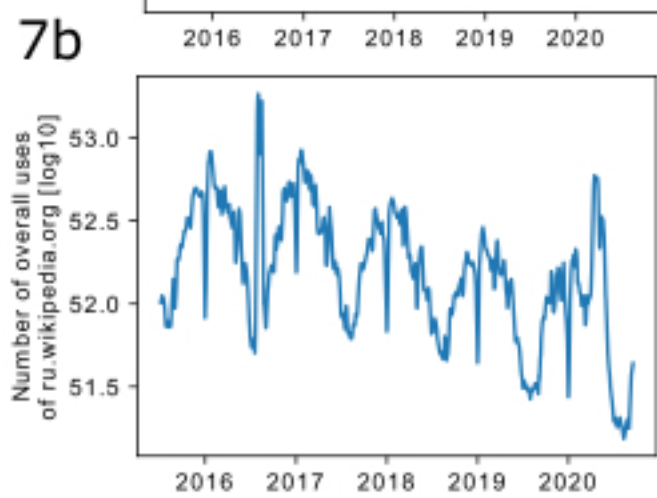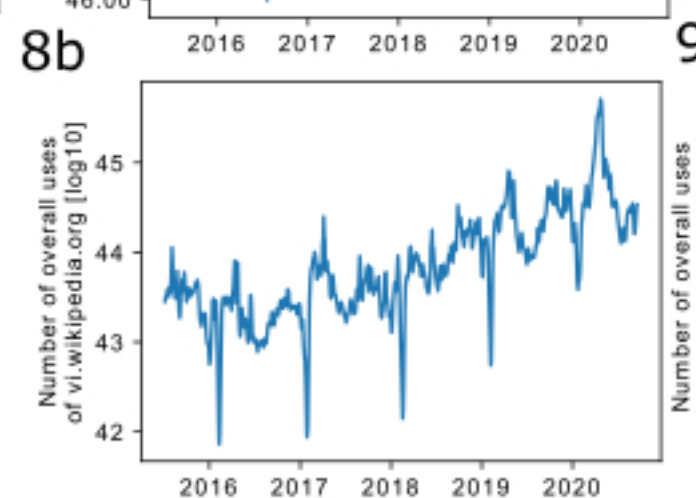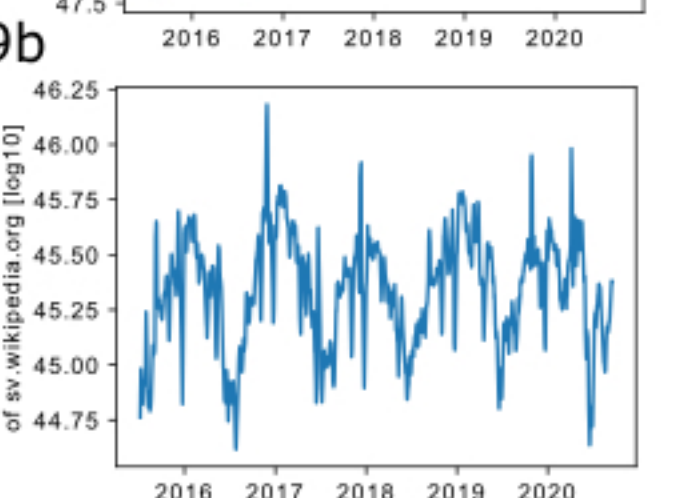

## 10 German

2010  
Asperger\_syndrome  
Multiple\_sclerosis  
Borderline\_personality\_disorder  
Tuberculosis  
Bipolar\_disorder

2011  
Borderline\_personality\_disorder  
Asperger\_syndrome  
Multiple\_sclerosis  
Affective\_lateral\_sclerosis

2012  
Tuberculosis  
Asperger\_syndrome  
Schizophrenia  
Borderline\_personality\_disorder  
Sexual\_intercourse

2013  
Tuberculosis  
Asperger\_syndrome  
Sexual\_intercourse  
Bipolar\_disorder

2014  
Social\_intercourse  
Bipolar\_disorder  
Autism  
Asperger\_syndrome  
Borderline\_personality\_disorder

2015  
Pandemic  
Spanish\_flu  
COVID\_19\_pandemic

## 11 French

2010  
Leonardo da Vinci  
Lyme disease  
Schizophrenia  
Asperger\_syndrome

2011  
Lyme disease  
Schizophrenia  
Leonardo da Vinci  
Asperger\_syndrome

2012  
Asperger\_syndrome  
Leonardo da Vinci  
Schizophrenia  
Body\_mass\_index

2013  
Asperger\_syndrome  
Leonardo da Vinci  
Schizophrenia

2014  
Lyme disease  
Asperger\_syndrome  
Schizophrenia  
Leonardo da Vinci

2015  
Coronavirus  
Spanish\_flu  
COVID\_19\_pandemic  
Coronavirus disease 2019

## 12 Spanish

2010  
Asperger\_syndrome  
Paracetamol  
Leonardo da Vinci

2011  
Asperger\_syndrome  
Leonardo da Vinci  
Paracetamol  
Dengue\_fever

2012  
Leonardo da Vinci  
Blood\_type  
Asperger\_syndrome  
Paracetamol

2013  
Asperger\_syndrome  
Leonardo da Vinci  
Paracetamol

2014  
Paracetamol  
Leonardo da Vinci  
Asperger\_syndrome  
Sigmund Freud

2015  
Spanish flu  
Coronavirus disease 2019  
Black Death  
COVID\_19\_pandemic

## 13 Italian

2010  
Asperger\_syndrome  
Leonardo da Vinci  
Crohn's disease

2011  
Meningitis  
Leonardo da Vinci  
Asperger\_syndrome

2012  
Crohn's disease  
Leonardo da Vinci  
Lyme disease  
Asperger\_syndrome

2013  
Lyme disease  
Asperger\_syndrome  
Leonardo da Vinci  
Crohn's disease

2014  
Lyme disease  
Asperger\_syndrome  
Crohn's disease  
Leonardo da Vinci

2015  
Coronavirus disease 2019  
COVID\_19\_pandemic  
Spanish flu  
Black Death

## 14 Dutch

2010  
Leonardo da Vinci  
Asperger\_syndrome  
Bipolar disorder  
MDMA

2011  
Asperger\_syndrome  
Leonardo da Vinci  
Ethanol  
Schizophrenia  
Bipolar disorder

2012  
Bipolar disorder  
Tuberculosis  
Leonardo da Vinci  
Asperger\_syndrome

2013  
Borderline\_personality\_disorder  
Bipolar disorder  
Leonardo da Vinci  
Asperger\_syndrome

2014  
Bipolar disorder  
Asperger\_syndrome  
Leonardo da Vinci  
Trazodone

2015  
Coronavirus  
Spanish flu  
Pandemic  
Coronavirus disease 2019

## 15 Polish

2010  
Multiple\_sclerosis  
Asperger\_syndrome  
Schizophrenia  
Blood\_type

2011  
Asperger\_syndrome  
Schizophrenia  
Blood\_type  
Lyme disease

2012  
Blood type  
Syphilis  
Asperger\_syndrome  
Bipolar disorder

2013  
Borderline\_personality\_disorder  
Syphilis  
Schizophrenia  
Bipolar disorder  
Asperger\_syndrome  
Cocaine

2014  
Ethanol  
Amphetamine  
Cocaine  
Asperger\_syndrome  
Bipolar disorder  
Schizophrenia  
Cannabis

2015  
Influenza  
Coronavirus  
Spanish flu  
Black Death  
Coronavirus disease 2019  
COVID\_19\_pandemic

## 16 Russian

2010  
Schizophrenia  
Autism  
Alzheimer's disease  
Leonardo da Vinci

2011  
Leonardo da Vinci  
Alzheimer's disease  
Autism  
Schizophrenia

2012  
Leonardo da Vinci  
Autism  
Schizophrenia

2013  
Schizophrenia  
Autism  
Measles  
Obsessive compulsive disorder

2014  
Obsessive compulsive disorder  
Autism  
Measles  
Leonardo da Vinci

2015  
Obsessive compulsive disorder  
COVID\_19\_pandemic  
Spanish flu  
Pandemic  
Bubonic plague

## 17 Vietnamese

2010  
Sexual\_intercourse  
Blood\_type  
Methamphetamine  
Body\_mass\_index

2011  
Blood\_type  
Sexual\_intercourse  
Cancer  
Zika virus  
Methamphetamine

2012  
Methamphetamine  
HIV  
Blood\_type  
Sexual\_intercourse  
Cannabis

2013  
Cannabis  
Paracetamol  
Virus  
Blood\_type  
Sexual\_intercourse  
Methamphetamine

2014  
Cannabis  
Paracetamol  
Virus  
AIDS  
Sexual\_intercourse  
Methamphetamine

2015  
Virus  
Coronavirus disease 2019  
COVID\_19\_pandemic  
Sexual\_intercourse

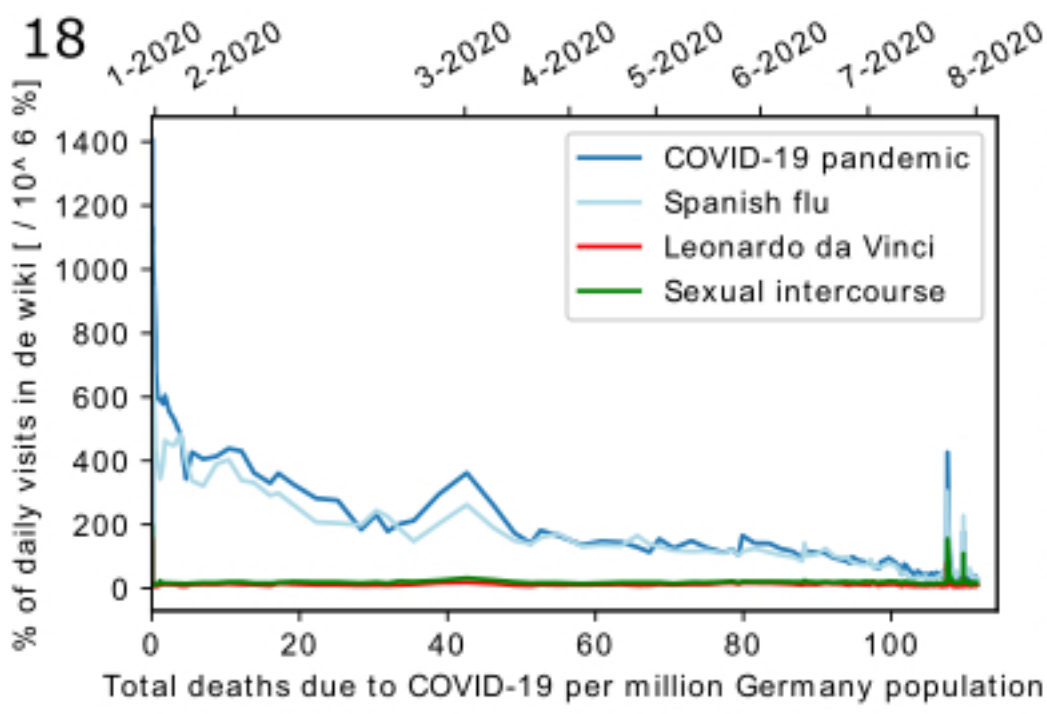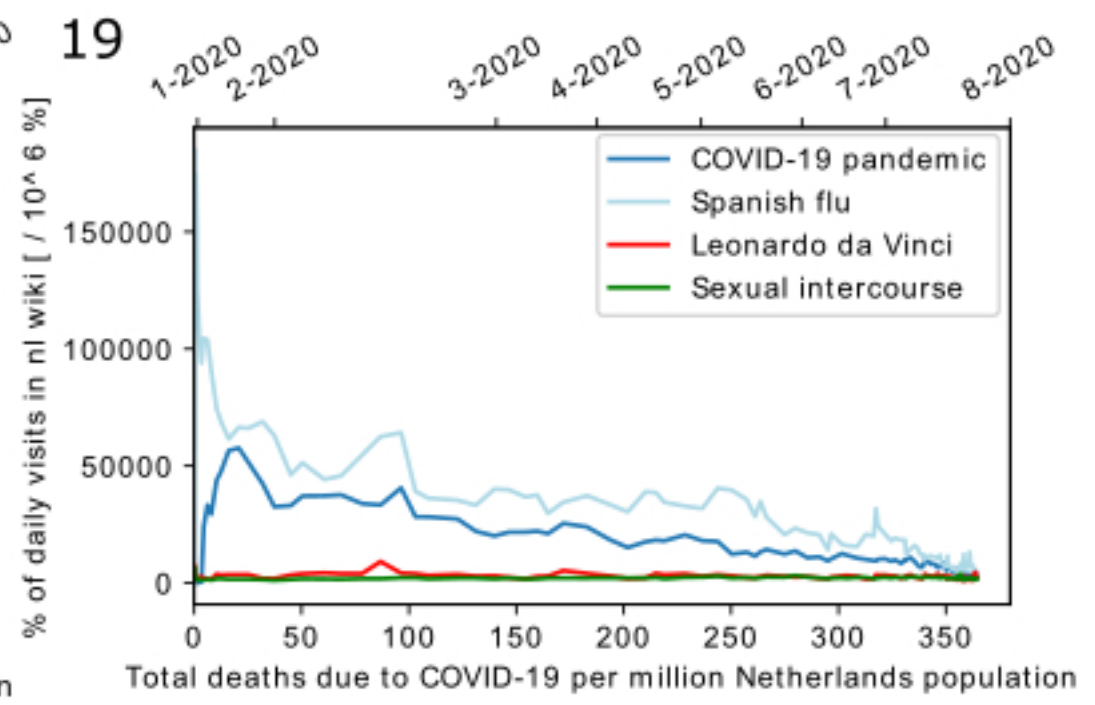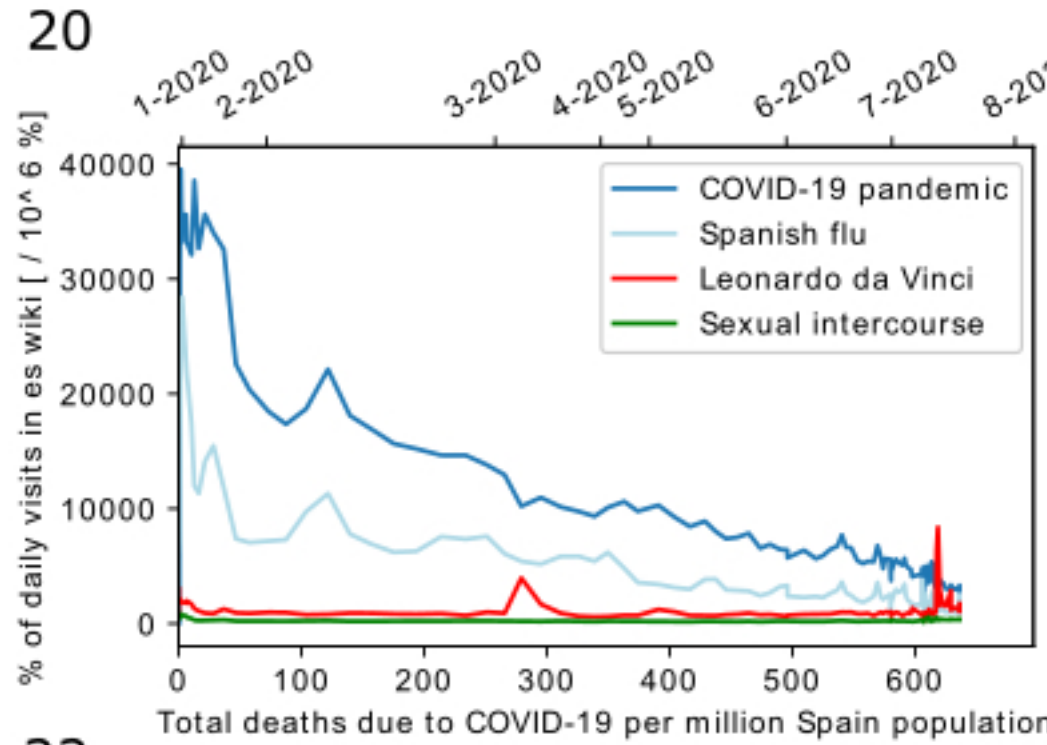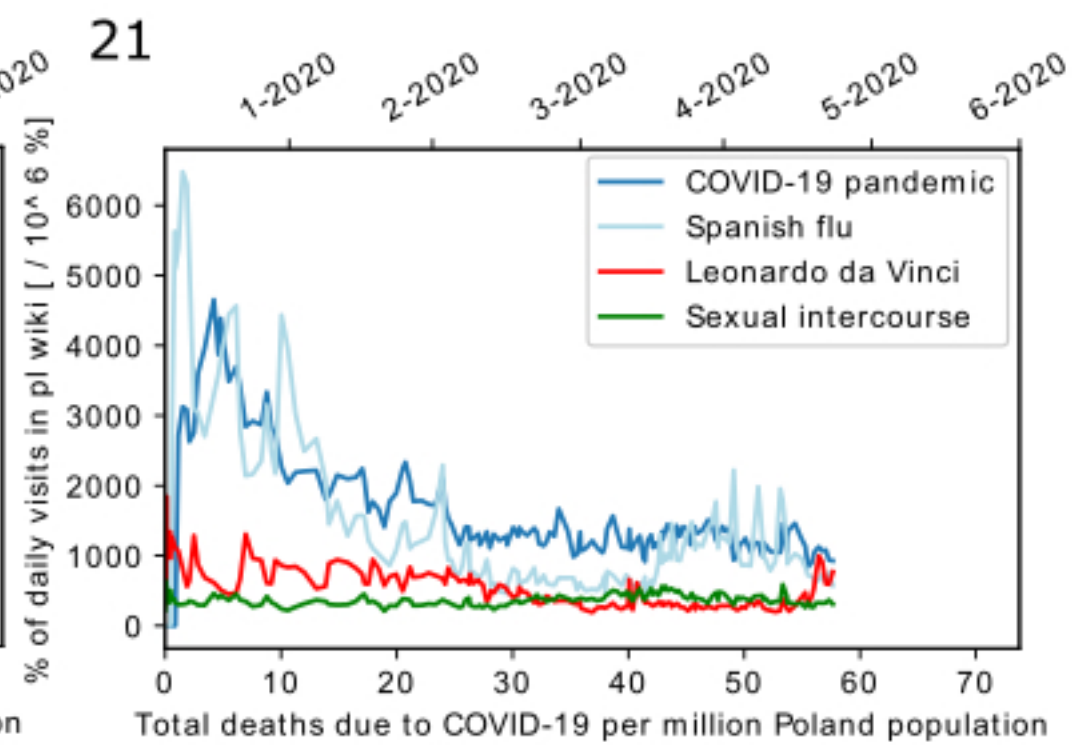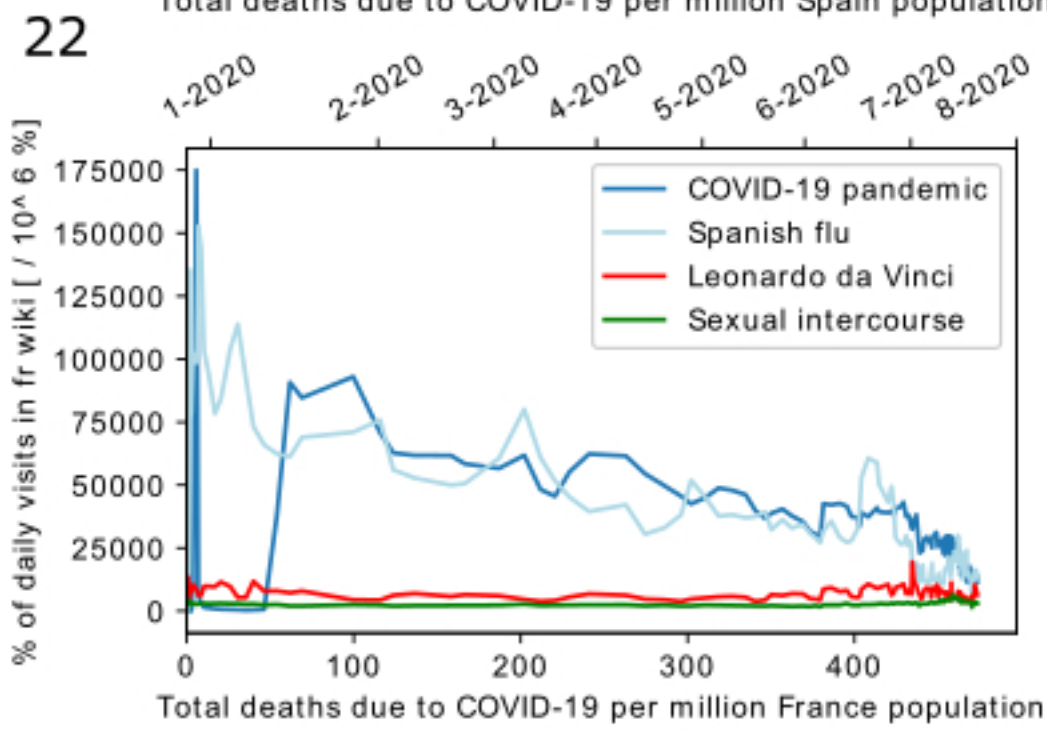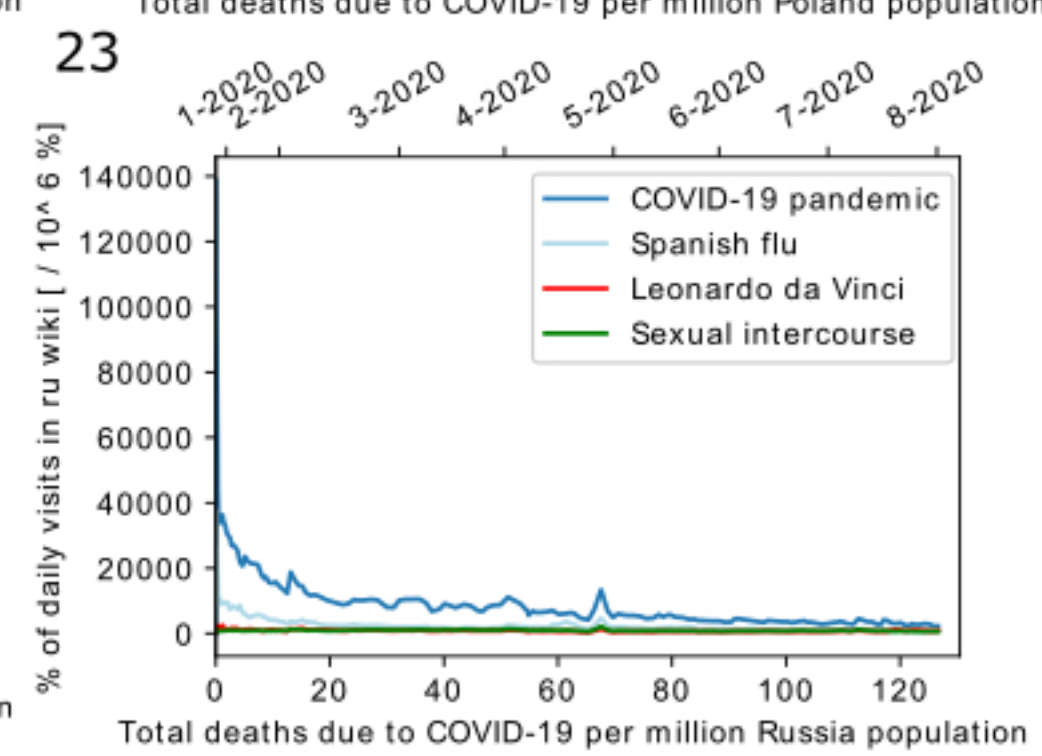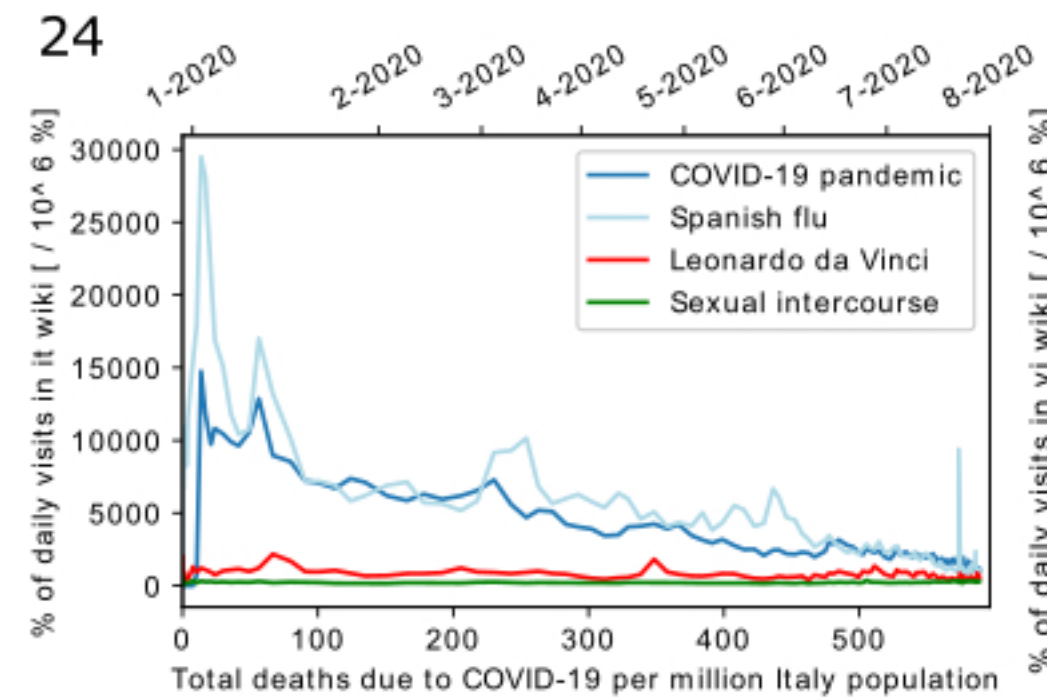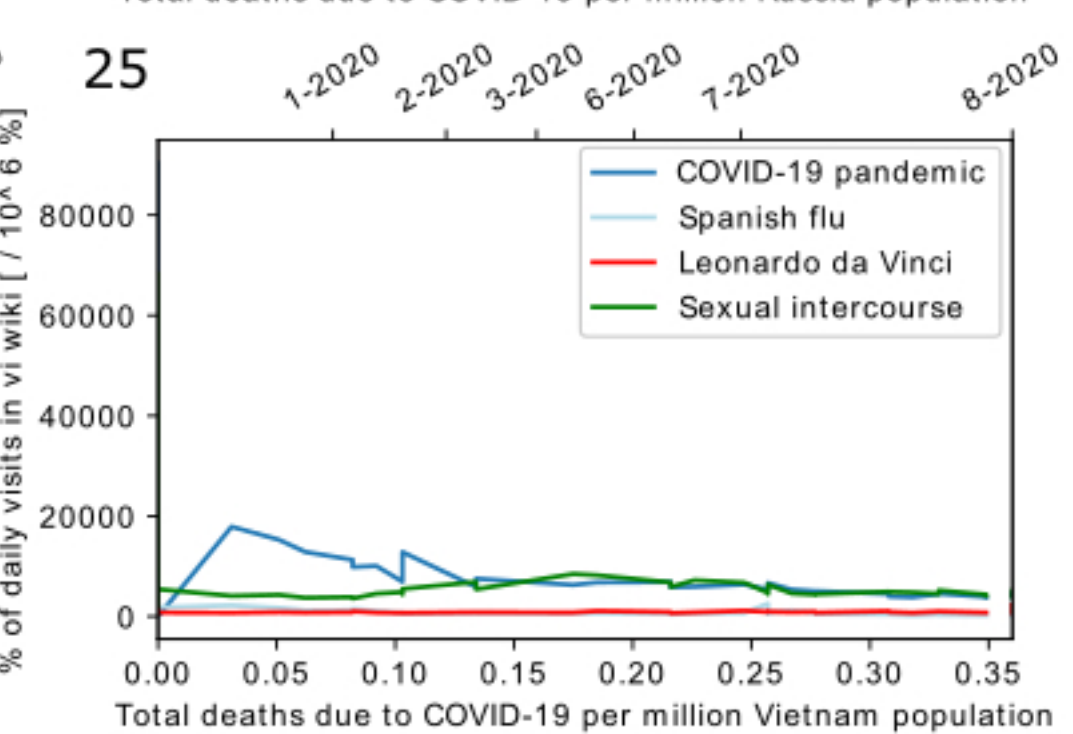

Supplement: jmir_v23i4e26331_app4.pdf [file jmir_v23i4e26331_app4.pdf]
