# Supplementary material for: Assessing Public Interest Based on Wikipedia’s Most Visited Medical Articles During the SARS-CoV-2 Outbreak: Search Trends Analysis
Source: PubMed Central journal article supplement (PMC8049630; doi:10.2196/26331), 2021-04-12
Supplement: jmir_v23i4e26331_app3.pdf [file jmir_v23i4e26331_app3.pdf]

1

2015

Leonardo da Vinci  
Sexual intercourse  
Lyme disease  
Asperger syndrome

Narcissistic personality disorder Bipolar disorder  
Tuberculosis Schizophrenia Trypophobia

2016

Zika virus  
Sexual intercourse  
Asperger syndrome  
Tuberculosis Leonardo da Vinci Bipolar disorder  
Schizophrenia Lyme disease Narcissistic personality disorder Pneumonia

2017

Leonardo da Vinci  
Sexual intercourse Tuberculosis  
Asperger syndrome Black Death  
Schizophrenia Pneumonia Lyme disease  
Bipolar disorder Fentanyl

2018

Sexual intercourse  
Leonardo da Vinci Asperger syndrome  
Crohn's disease Borderline personality disorder  
Black Death Bipolar disorder Ketogenic diet  
Pneumonia Fentanyl

2019

Elizabeth Holmes  
Leonardo da Vinci  
Sexual intercourse  
Asperger syndrome  
Black Death Pneumonia  
Ketogenic diet Borderline personality disorder  
Lyme disease Crohn's disease

2020

Coronavirus Spanish flu  
COVID-19 pandemic  
Coronavirus disease 2019 Black Death  
Pandemic Virus World Health Organization  
Bubonic plague Sexual intercourse
